# Supplementary material for: A Review of the Clinical, Economic, and Societal Burden of Treatment-Resistant Depression: 1996–2013
Source: Atypon-hosted journal article supplement (doi:10.1176/appi.ps.201300059), 2014-05-01
Supplement: 977_ds001.pdf [file 977_ds001.pdf]

# Appendices

## Appendix 1. Methods

### *Data sources*

Medline was searched using PubMed (National Center for Biotechnology Information, U.S. National Library of Medicine) for reports published between January 1996 and May 2011. The search terms used are presented in Appendix 2. The search was limited to identify publications of studies that had primary data collection (e.g., “journal article”) and to omit case reports, reviews, editorials, and letters. All other designs were included. Other limits included studies of humans and papers written in the English language. The search was augmented with additional PubMed search terms, with a search of economic outcomes through August 2013, and by using the Tufts Cost-Effectiveness Analyses (CEA) Registry (1), an online repository of cost-effectiveness studies. The search was also augmented by including the STAR\*D trials. STAR\*D, which used a more inclusive treatment-resistance criterion than this review (i.e. failure to remit), provided valuable comparators as the largest and longest study evaluating depression treatment.

### *Study selection*

Two researchers screened each abstract of the retrieved references for potentially relevant studies (Appendix 3). Papers were included if the abstract referred to primary data collection as a part of the study; the endpoints were pertinent to clinical, societal, or economic outcomes; the study did not primarily assess pharmacokinetic or in vitro endpoints; the study dealt with an adult population (>18 years of age); and the target population had treatment-resistant depression. Teenagers’ developing brains make adolescent depression a qualitatively different phenomenon, so studies of adolescents

were excluded to increase consistency of treatments, disease progression, and lifetime impact in an adult population. Two researchers then reviewed the full text of each potentially relevant study and independently recorded relevant data. These 2 extractions were subsequently reconciled into the final list of data for analyses.

This study's criterion for treatment-resistance was defined broadly to include studies with heterogeneous treatment-resistance definitions while conforming to accepted criteria: failure to respond to 1 or more adequate trials of drug therapy. An "adequate" trial was defined as being  $\geq 6$  weeks in duration (2, 3), with appropriate doses of treatment (4-7); response was defined as a  $\geq 50\%$  decrease in symptoms (8). In the absence of detailed descriptions of patient characteristics, "treatment-resistant" criteria were also fulfilled by any patient populations whose members were described as being "resistant" or "refractory" to treatment; this was done to avoid excluding possible treatment-resistant depression populations.

### ***Data extraction and assessment of study quality***

Extracted data included, where available, the following: author(s), year of publication, journal, study design (e.g., randomized control trial, observational), number of study arms and patients per arm, study duration, evidence grade, sample size, the percentage of women in the study, mean age, ethnic background, duration of illness at study entry, number of prior depressive episodes, and mean or median patient survival.

Data were also recorded on the names of antidepressant drugs reported in the study, their duration of use and cost, as well as the incidence and cost of medical and psychiatric hospitalizations, emergency department visits, and physician visits. Costs were reported in 2012 US dollars using the medical component of the Consumer Price Index for inflation. Rates of labor force participation, absenteeism, presenteeism (attending work while not healthy), homelessness, crime, and use of social services were documented. Data were extracted on incidence of treatment-resistant depression,

symptom severity, deaths, and comorbidities and adverse events that occurred during the study period. In the absence of qualifying data, any adverse event that resulted in discontinuation of a drug or hospitalization was classified as severe. Otherwise, adverse events not clearly specified as severe were assumed to be mild/moderate.

Mortality and suicide rates were recorded, including the number and prevalence of previous suicide attempts, suicidal ideation, self-injury, suicide attempts that resulted in death, and mortality due to different comorbidities. Mean baseline and changes in quality-of-life scales, utility scales, quality-adjusted life years, and disability-adjusted life years were obtained for patients and caregivers, if reported. Mean baseline and/or change in symptom severity of standardized assessment scales was recorded. Available data were extracted on the proportion of patients with treatment-resistant depression who had a treatment response, as defined by a  $\geq 50\%$  decrease in the HAM-D scores, QIDS-C16, or MADRS, or a HAM-D-17 score  $< 10$ ; and remission, as defined by a HAM-D-17 score of  $\leq 7$ , a HAM-D-24 score of  $\leq 8$ , a QIDS-C16 score of  $\leq 5$ , or a MADRS score of  $\leq 8$  (8-19).

The evidence grade for each study was assessed using the Quality Index developed by the Mental Disorders and Illicit Drug Use Expert Group (20). The Quality Index was developed to quantify and assess the representativeness of the studies and to ensure quality transparency for each reference. It includes items pertaining to completeness of reporting, ascertainment of cases, measurement instruments, diagnostic criteria, outcome, and follow-up. The maximum achievable score on the Quality Index is 19.

### ***Data synthesis***

Evidence tables were developed to facilitate data entry using Microsoft Excel worksheets. Analyses were performed using Stata™ version 9.2 (StataCorp, College Station, TX). Frequency distributions were generated for categorical variables (e.g., gender). For continuous variables (e.g., sample size), the distribution was summarized

using mean, median, standard deviations between studies, and minimum and maximum values across studies. A change in response rates was statistically analyzed using pooled estimates and by weighting studies with inverse-variance methodology (21). Summary statistics were weighted by sample size. Unless stated otherwise, results are reported for the treatment-resistant population, as mean  $\pm$  standard deviation.

## **References**

1. Tufts Medical Center Cost-Effectiveness Analysis Registry. 2011 [cited 2011 10/4]; Available from: <https://research.tufts-nemc.org/cear4/>
2. Corey-Lisle PK, Birnbaum HG, Greenberg PE, et al: Identification of a claims data "signature" and economic consequences for treatment-resistant depression. *Journal of Clinical Psychiatry* 63:717-726, 2002
3. Marangell LB, George MS, Callahan AM, et al: Effects of intrathecal thyrotropin-releasing hormone (protirelin) in refractory depressed patients. *Archives of General Psychiatry* 54:214-222, 1997
4. Barbee JG, Jamhour NJ: Lamotrigine as an augmentation agent in treatment-resistant depression. *Journal of Clinical Psychiatry* 63:737-741, 2002
5. Dombrovski AY, Mulsant BH, Haskett RF, et al: Predictors of remission after electroconvulsive therapy in unipolar major depression. *Journal of Clinical Psychiatry* 66:1043-1049, 2005
6. Petersen T, Gordon JA, Kant A, et al: Treatment resistant depression and axis I co-morbidity. *Psychological Medicine* 31:1223-1229, 2001
7. Souery D, Oswald P, Massat I, et al: Clinical factors associated with treatment resistance in major depressive disorder: results from a European multicenter study. *Journal of Clinical Psychiatry* 68:1062-1070, 2007
8. Nierenberg AA, Dececco LM: Definitions of antidepressant treatment response, remission, nonresponse, partial response, and other relevant outcomes: a focus

- on treatment-resistant depression. *Journal of Clinical Psychiatry* 62 Suppl 16:5-9, 2001
9. Fava M, Rush AJ, Wisniewski SR, et al: A comparison of mirtazapine and nortriptyline following two consecutive failed medication treatments for depressed outpatients: a STAR\*D report. *American Journal of Psychiatry* 163:1161-1172, 2006
  10. Bares M, Brunovsky M, Kopecek M, et al: Early reduction in prefrontal theta QEEG cordance value predicts response to venlafaxine treatment in patients with resistant depressive disorder. *European Psychiatry* 23:350-355, 2008
  11. Corya SA, Williamson D, Sanger TM, et al: A randomized, double-blind comparison of olanzapine/fluoxetine combination, olanzapine, fluoxetine, and venlafaxine in treatment-resistant depression. *Depression and Anxiety* 23:364-372, 2006
  12. Doree JP, Des Rosiers J, Lew V, et al: Quetiapine augmentation of treatment-resistant depression: a comparison with lithium. *Current Medical Research and Opinion* 23:333-341, 2007
  13. Inoue T, Tsuchiya K, Miura J, et al: Bromocriptine treatment of tricyclic and heterocyclic antidepressant-resistant depression. *Biological Psychiatry* 40:151-153, 1996
  14. Karp JF, Whyte EM, Lenze EJ, et al: Rescue pharmacotherapy with duloxetine for selective serotonin reuptake inhibitor nonresponders in late-life depression: outcome and tolerability. *Journal of Clinical Psychiatry* 69:457-463, 2008
  15. Mahmoud RA, Pandina GJ, Turkoz I, et al: Risperidone for treatment-refractory major depressive disorder: a randomized trial. *Annals of Internal Medicine* 147:593-602, 2007
  16. Papakostas GI, Petersen T, Pava J, et al: Hopelessness and suicidal ideation in outpatients with treatment-resistant depression: prevalence and impact on treatment outcome. *Journal of Nervous and Mental Disease* 191:444-449, 2003

17. Schindler F, Angheliescu IG: Lithium versus lamotrigine augmentation in treatment resistant unipolar depression: a randomized, open-label study. *International Clinical Psychopharmacology* 22:179-182, 2007
18. Seidman SN, Miyazaki M, Roose SP: Intramuscular testosterone supplementation to selective serotonin reuptake inhibitor in treatment-resistant depressed men: randomized placebo-controlled clinical trial. *Journal of Clinical Psychopharmacology* 25:584-588, 2005
19. Shelton RC, Tollefson GD, Tohen M, et al: A novel augmentation strategy for treating resistant major depression. *American Journal of Psychiatry* 158:131-134, 2001
20. Mental disorders and illicit drug use expert group: Methodology part 2: Systematic review. Sydney, Australia: University of New South Wales; 2007; Available from:  
[http://www.med.unsw.edu.au/gbdweb.nsf/resources/MethodologyPart2/\\$file/GBD\\_Methodology\\_pt2\\_03Nov08.pdf](http://www.med.unsw.edu.au/gbdweb.nsf/resources/MethodologyPart2/$file/GBD_Methodology_pt2_03Nov08.pdf)
21. Deeks J, Altman D, Mj B: Statistical methods for examining heterogeneity and combining results from several studies in meta-analysis.; in *Systematic Reviews in Health Care: Meta-Analysis in Context*, 2nd Edition. Edited by: Egger M, Smith G, Altman D. London, BMJ, 2001

## **Appendix 2. Detailed electronic search strategy**

### **MAIN SEARCH TERMS**

#### **Treatment-resistant-depression-related**

“major depressive disorder”, “major depression”, “MDD”, “treatment-resistant”, “TRD”,  
“drug resistant”, “refractory”, “resistant”

#### **Outcomes-related**

“mortality”, “morbidity”, “survival”, “quality of life”, “adverse drug reaction”, “ADR”,  
“suicide”

#### **Economic-related**

“cost”, “economic”, “burden of illness”, “cost of illness”, “hospitalization”,  
“decompensation”, “work productivity”, “workplace efficiency”, “presenteeism”,  
“absenteeism,” “employment”

#### **Society related**

“crime”, “homicide”

### **SUPPLEMENTAL PUBMED SEARCH TERMS**

#### **Treatment-resistant-depression-related**

Same as above

### **Outcomes-related**

“metabolic disease[MeSH]”, “diabetes”, “obesity”, “lipid disorders”, “diabetic”,  
“metabolic syndrome”, “insulin”, “side effects”, “adverse events”, “tolerability”,  
“tolerability[MeSH]”, “toxicity”, “toxicities”, “induced mania”, “QIDS”, “quick  
inventory for depressive symptomatology”

### **Economic-related**

“emergency”, “ER”, “emergency room”, “emergency[MeSH]”, “ED”, “emergency  
department”

### **LIMITS**

**Subjects** — Humans

**Publication types** — Journal Article, Clinical Trial, Randomized Controlled Trial,  
Clinical Trial, Phase I, Clinical Trial, Phase II, Clinical Trial, Phase III, Clinical  
Trial, Phase IV, Comparative Study, Controlled Clinical Trial, Multicenter Study

**Language** — English

**Publication Date** — January, 1996 to May, 2011<sup>a</sup>

*Abbreviations: MeSH - Medical Subject Heading.*

<sup>a</sup> *Additional supplemental search conducted using treatment-resistant-depression-related search terms and all economic-related search terms for publications between May 2011 and August 2013.*



**Appendix 3. Flow diagram of literature search**

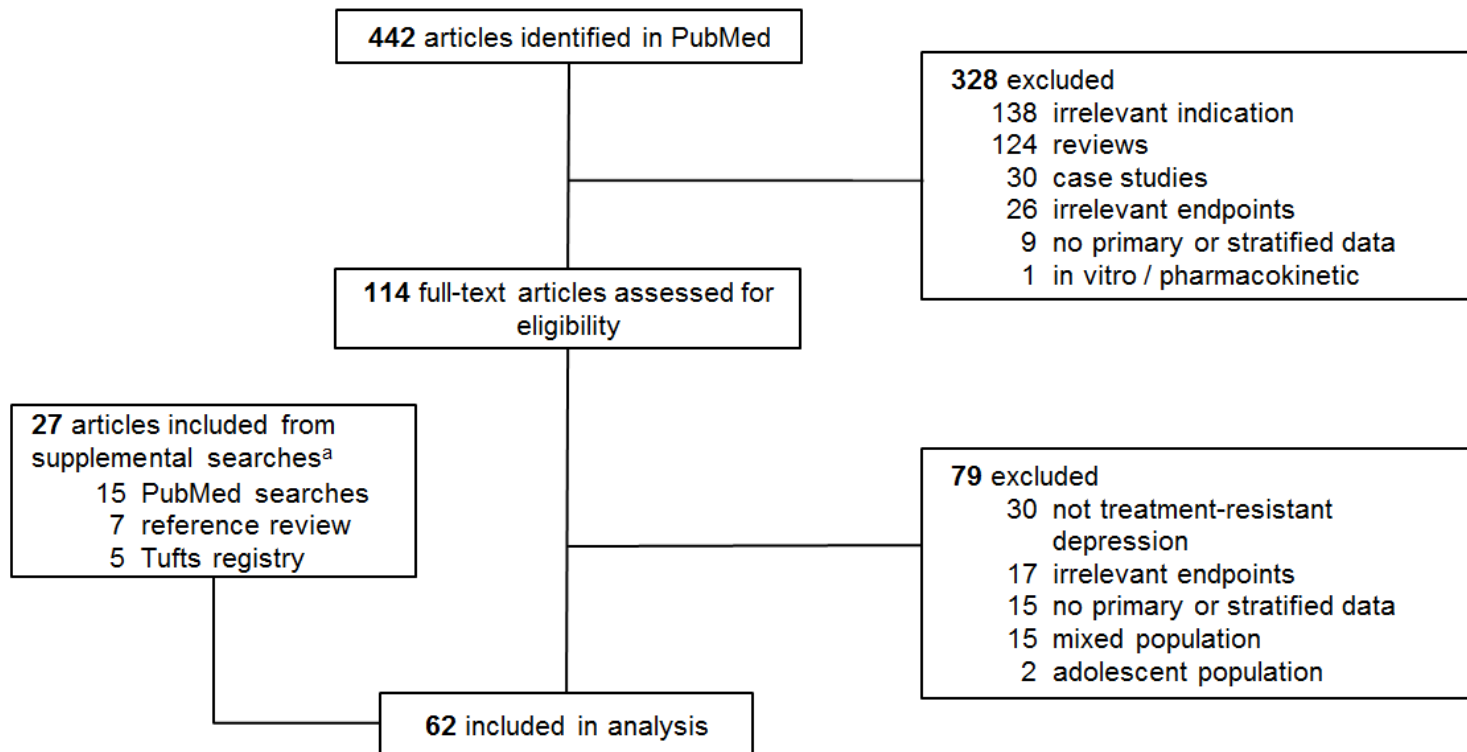

<sup>a</sup>Tufts CEA registry search, reference review of cost articles, and PubMed search on adverse events, emergency room costs, costs through August 2013, and Quick Inventory of Depressive Symptomatology severity scale.

#### **Appendix 4. Identified studies on the burden of illness of treatment-resistant-depression**

- 1 Avery DH, Isenberg KE, Sampson SM, et al: Transcranial magnetic stimulation in the acute treatment of major depressive disorder: clinical response in an open-label extension trial. *Journal of Clinical Psychiatry* 69:441-451, 2008
- 2 Aziz M, Mehninger AM, Mozurkewich E, et al: Cost-utility of 2 maintenance treatments for older adults with depression who responded to a course of electroconvulsive therapy: results from a decision analytic model. *Can J Psychiatry* 50:389-397, 2005
- 3 Barbee JG, Jamhour NJ: Lamotrigine as an augmentation agent in treatment-resistant depression. *Journal of Clinical Psychiatry* 63:737-741, 2002
- 4 Bares M, Brunovsky M, Kopecek M, et al: Early reduction in prefrontal theta QEEG concordance value predicts response to venlafaxine treatment in patients with resistant depressive disorder. *European Psychiatry* 23:350-355, 2008
- 5 Bauer M, Bschor T, Kunz D, et al: Double-blind, placebo-controlled trial of the use of lithium to augment antidepressant medication in continuation treatment of unipolar major depression. *Am J Psychiatry* 157:1429-1435, 2000
- 6 Benedict A, Arellano J, De Cock E, et al: Economic evaluation of duloxetine versus serotonin selective reuptake inhibitors and venlafaxine XR in treating major depressive disorder in Scotland. *J Affect Disord* 120:94-104, 2010
- 7 Bewernick BH, Hurlmann R, Matusch A, et al: Nucleus accumbens deep brain stimulation decreases ratings of depression and anxiety in treatment-resistant depression. *Biol Psychiatry* 67:110-116, 2010
- 8 Bewernick BH, Kayser S, Sturm V, et al: Long-term effects of nucleus accumbens deep brain stimulation in treatment-resistant depression: evidence for sustained

- efficacy. *Neuropsychopharmacology* 37:1975-1985, 2012
- 9 Carmody TJ, Rush AJ, Bernstein IH, et al: Making clinicians lives easier: guidance on use of the QIDS self-report in place of the MADRS. *J Affect Disord* 95:115-118, 2006
  - 10 Corey-Lisle PK, Birnbaum HG, Greenberg PE, et al: Identification of a claims data "signature" and economic consequences for treatment-resistant depression. *Journal of Clinical Psychiatry* 63:717-726, 2002
  - 11 Corya SA, Williamson D, Sanger TM, et al: A randomized, double-blind comparison of olanzapine/fluoxetine combination, olanzapine, fluoxetine, and venlafaxine in treatment-resistant depression. *Depression and Anxiety* 23:364-372, 2006
  - 12 Diazgranados N, Ibrahim LA, Brutsche NE, et al: Rapid resolution of suicidal ideation after a single infusion of an N-methyl-D-aspartate antagonist in patients with treatment-resistant major depressive disorder. *Journal of Clinical Psychiatry* 71:1605-1611
  - 13 Dombrovski AY, Mulsant BH, Haskett RF, et al: Predictors of remission after electroconvulsive therapy in unipolar major depression. *Journal of Clinical Psychiatry* 66:1043-1049, 2005
  - 14 Doree JP, Des Rosiers J, Lew V, et al: Quetiapine augmentation of treatment-resistant depression: a comparison with lithium. *Current Medical Research and Opinion* 23:333-341, 2007
  - 15 Dumas R, Richieri R, Guedj E, et al: Improvement of health-related quality of life in depression after transcranial magnetic stimulation in a naturalistic trial is associated with decreased perfusion in precuneus. *Health Qual Life Outcomes* 10:87, 2012
  - 16 Fava M, Rush AJ, Wisniewski SR, et al: A comparison of mirtazapine and nortriptyline following two consecutive failed medication treatments for depressed

- outpatients: a STAR\*D report. *American Journal of Psychiatry* 163:1161-1172, 2006
- 17 Feldman RL, Dunner DL, Muller JS, et al: Medicare patient experience with vagus nerve stimulation for treatment-resistant depression. *J Med Econ* 16:62-74, 2013
  - 18 Ferrucci R, Bortolomasi M, Vergari M, et al: Transcranial direct current stimulation in severe, drug-resistant major depression. *Journal of Affective Disorders* 118:215-219, 2009
  - 19 Gabriel A: Lamotrigine adjunctive treatment in resistant unipolar depression: an open, descriptive study. *Depress Anxiety* 23:485-488, 2006
  - 20 Gibson TB, Jing Y, Smith Carls G, et al: Cost burden of treatment resistance in patients with depression. *Am J Manag Care* 16:370-377, 2010
  - 21 Guo WB, Liu F, Chen JD, et al: Abnormal neural activity of brain regions in treatment-resistant and treatment-sensitive major depressive disorder: a resting-state fMRI study. *J Psychiatr Res* 46:1366-1373, 2012
  - 22 Guo WB, Liu F, Chen JD, et al: Altered white matter integrity of forebrain in treatment-resistant depression: a diffusion tensor imaging study with tract-based spatial statistics. *Prog Neuropsychopharmacol Biol Psychiatry* 38:201-206, 2012
  - 23 Guo WB, Sun XL, Liu L, et al: Disrupted regional homogeneity in treatment-resistant depression: a resting-state fMRI study. *Prog Neuropsychopharmacol Biol Psychiatry* 35:1297-1302, 2011
  - 24 Inoue T, Tsuchiya K, Miura J, et al: Bromocriptine treatment of tricyclic and heterocyclic antidepressant-resistant depression. *Biological Psychiatry* 40:151-153, 1996
  - 25 Ivanova JI, Birnbaum HG, Kidolezi Y, et al: Direct and indirect costs of employees with treatment-resistant and non-treatment-resistant major depressive disorder.

- 26 Karp JF, Whyte EM, Lenze EJ, et al: Rescue pharmacotherapy with duloxetine for selective serotonin reuptake inhibitor nonresponders in late-life depression: outcome and tolerability. *Journal of Clinical Psychiatry* 69:457-463, 2008
- 27 Kennedy N, Paykel ES: Treatment and response in refractory depression: results from a specialist affective disorders service. *J Affect Disord* 81:49-53, 2004
- 28 Keshtkar M, Ghanizadeh A, Firoozabadi A: Repetitive transcranial magnetic stimulation versus electroconvulsive therapy for the treatment of major depressive disorder, a randomized controlled clinical trial. *J ECT* 27:310-314, 2011
- 29 Kocsis JH, Gelenberg AJ, Rothbaum B, et al: Chronic forms of major depression are still undertreated in the 21st century: systematic assessment of 801 patients presenting for treatment. *J Affect Disord* 110:55-61, 2008
- 30 Kopell BH, Halverson J, Butson CR, et al: Epidural cortical stimulation of the left dorsolateral prefrontal cortex for refractory major depressive disorder. *Neurosurgery* 69:1015-1029; discussion 1029, 2011
- 31 Landen M, Hogberg P, Thase ME: Incidence of sexual side effects in refractory depression during treatment with citalopram or paroxetine. *J Clin Psychiatry* 66:100-106, 2005
- 32 Lenox-Smith A, Greenstreet L, Burslem K, et al: Cost effectiveness of venlafaxine compared with generic fluoxetine or generic amitriptyline in major depressive disorder in the UK. *Clin Drug Investig* 29:173-184, 2009
- 33 Lepine BA, Moreno RA, Campos RN, et al: Treatment-resistant depression increases health costs and resource utilization. *Rev Bras Psiquiatr* 34:379-388, 2012
- 34 Liu F, Guo W, Yu D, et al: Classification of different therapeutic responses of major

- depressive disorder with multivariate pattern analysis method based on structural MR scans. *PLoS One* 7:e40968, 2012
- 35 Lozano AM, Mayberg HS, Giacobbe P, et al: Subcallosal cingulate gyrus deep brain stimulation for treatment-resistant depression. *Biol Psychiatry* 64:461-467, 2008
  - 36 Mahmoud RA, Pandina GJ, Turkoz I, et al: Risperidone for treatment-refractory major depressive disorder: a randomized trial. *Annals of Internal Medicine* 147:593-602, 2007
  - 37 Malone DA, Jr., Dougherty DD, Rezai AR, et al: Deep brain stimulation of the ventral capsule/ventral striatum for treatment-resistant depression. *Biol Psychiatry* 65:267-275, 2009
  - 38 Nuijten MJ: Assessment of clinical guidelines for continuation treatment in major depression. *Value Health* 4:281-294, 2001
  - 39 Olchanski N, Mcinnis Myers M, Halseth M, et al: The economic burden of treatment-resistant depression. *Clin Ther* 35:512-522, 2013
  - 40 Orengo CA, Fullerton L, Kunik ME: Safety and efficacy of testosterone gel 1% augmentation in depressed men with partial response to antidepressant therapy. *J Geriatr Psychiatry Neurol* 18:20-24, 2005
  - 41 Papakostas GI, Petersen T, Denninger J, et al: Somatic symptoms in treatment-resistant depression. *Psychiatry Res* 118:39-45, 2003
  - 42 Papakostas GI, Petersen T, Iosifescu DV, et al: Axis III disorders in treatment-resistant major depressive disorder. *Psychiatry Res* 118:183-188, 2003
  - 43 Papakostas GI, Petersen T, Pava J, et al: Hopelessness and suicidal ideation in outpatients with treatment-resistant depression: prevalence and impact on treatment outcome. *Journal of Nervous and Mental Disease* 191:444-449, 2003

- 44 Papakostas GI, Petersen TJ, Farabaugh AH, et al: Psychiatric comorbidity as a predictor of clinical response to nortriptyline in treatment-resistant major depressive disorder. *J Clin Psychiatry* 64:1357-1361, 2003
- 45 Petersen T, Gordon JA, Kant A, et al: Treatment resistant depression and axis I comorbidity. *Psychological Medicine* 31:1223-1229, 2001
- 46 Petersen T, Hughes M, Papakostas GI, et al: Treatment-resistant depression and Axis II comorbidity. *Psychother Psychosom* 71:269-274, 2002
- 47 Preskorn SH, Baker B, Kolluri S, et al: An innovative design to establish proof of concept of the antidepressant effects of the NR2B subunit selective N-methyl-D-aspartate antagonist, CP-101,606, in patients with treatment-refractory major depressive disorder. *J Clin Psychopharmacol* 28:631-637, 2008
- 48 Prochazka H, Sjogren M, Agren H: Oral d-fenfluramine test in treatment-refractory depression. Plasma prolactin response compared in patients with and without suicide attempts and in a healthy reference group. *Journal of Affective Disorders* 57:201-208, 2000
- 49 Revicki DA, Wood M: Patient-assigned health state utilities for depression-related outcomes: differences by depression severity and antidepressant medications. *J Affect Disord* 48:25-36, 1998
- 50 Rush AJ, Bose A, Heydorn WE: Naturalistic study of the early psychiatric use of citalopram in the United States. *Depression and Anxiety* 16:121-127, 2002
- 51 Sava FA, Yates BT, Lupu V, et al: Cost-effectiveness and cost-utility of cognitive therapy, rational emotive behavioral therapy, and fluoxetine (Prozac) in treating depression: a randomized clinical trial. *J Clin Psychol* 65:36-52, 2009
- 52 Schindler F, Angheliescu IG: Lithium versus lamotrigine augmentation in treatment resistant unipolar depression: a randomized, open-label study. *International Clinical*

- Psychopharmacology 22:179-182, 2007
- 53 Seidman SN, Miyazaki M, Roose SP: Intramuscular testosterone supplementation to selective serotonin reuptake inhibitor in treatment-resistant depressed men: randomized placebo-controlled clinical trial. *Journal of Clinical Psychopharmacology* 25:584-588, 2005
- 54 Shelton RC, Tollefson GD, Tohen M, et al: A novel augmentation strategy for treating resistant major depression. *American Journal of Psychiatry* 158:131-134, 2001
- 55 Shulman KI, Fischer HD, Herrmann N, et al: Current prescription patterns and safety profile of irreversible monoamine oxidase inhibitors: a population-based cohort study of older adults. *J Clin Psychiatry* 70:1681-1686, 2009
- 56 Simpson KN, Welch MJ, Kozel FA, et al: Cost-effectiveness of transcranial magnetic stimulation in the treatment of major depression: a health economics analysis. *Adv Ther* 26:346-368, 2009
- 57 Souery D, Oswald P, Massat I, et al: Clinical factors associated with treatment resistance in major depressive disorder: results from a European multicenter study. *Journal of Clinical Psychiatry* 68:1062-1070, 2007
- 58 Sperling W, Reulbach U, Kornhuber J: Clinical benefits and cost effectiveness of vagus nerve stimulation in a long-term treatment of patients with major depression. *Pharmacopsychiatry* 42:85-88, 2009
- 59 Swan J, Sorrell E, Macvicar B, et al: "Coping with depression": an open study of the efficacy of a group psychoeducational intervention in chronic, treatment-refractory depression. *Journal of Affective Disorders* 82:125-129, 2004
- 60 Taneja C, Papakostas GI, Jing Y, et al: Cost-effectiveness of adjunctive therapy with atypical antipsychotics for acute treatment of major depressive disorder. *Ann*



Pharmacother 46:642-649, 2012

- 61 Zarate CA, Jr., Singh JB, Carlson PJ, et al: A randomized trial of an N-methyl-D-aspartate antagonist in treatment-resistant major depression. Arch Gen Psychiatry 63:856-864, 2006
- 62 Zhou Y, Qin LD, Chen J, et al: Brain microstructural abnormalities revealed by diffusion tensor images in patients with treatment-resistant depression compared with major depressive disorder before treatment. Eur J Radiol 80:450-454, 2011

**Appendix 5. Study design, subgroups, length, and quality of evidence<sup>a</sup>**

| Variable                                  | Patients per study |          |             | % of total studies (out of 49)           |
|-------------------------------------------|--------------------|----------|-------------|------------------------------------------|
|                                           | Mean               | ±        | SD          |                                          |
| <b>Study design</b>                       |                    |          |             |                                          |
| Phase III RCT                             | 122                | ±        | 118         | 14%                                      |
| Phase II RCT                              | 20                 | ±        | 9           | 10%                                      |
| Comparative randomized trial (no control) | 246                | ±        | 232         | 6%                                       |
| Non-randomized comparative trial          | 104                | ±        | 126         | 12%                                      |
| Non-randomized single arm trial           | 168                | ±        | 395         | 18%                                      |
| Retrospective cohort study                | 5521               | ±        | 9603        | 20%                                      |
| Cross sectional study                     | 72                 | ±        | 107         | 10%                                      |
| Case series                               | 35                 | ±        | 32          | 8%                                       |
| Case report                               | 0                  | ±        | NA          | 0%                                       |
| <b>Total</b>                              | <b>1239</b>        | <b>±</b> | <b>4756</b> | <b>100%</b>                              |
| <b>Number of treatment arms per study</b> |                    |          |             |                                          |
| 1                                         | 1878               | ±        | 6134        | 50%                                      |
| 2                                         | 353                | ±        | 1075        | 32%                                      |
| 3                                         | 28                 | ±        | NA          | 2%                                       |
| >3                                        | 483                | ±        | NA          | 4%                                       |
|                                           |                    |          |             | <b>% of total studies reporting data</b> |
| Study duration (months)                   | 93                 | ±        | 21          | 46%                                      |
| Quality of evidence score <sup>b</sup>    | 13                 | ±        | 3           | 100%                                     |

Abbreviations: NA - not applicable; RCT - randomized controlled trial; SD - standard deviation.

The SD was not reported when only one study provided results.

<sup>a</sup> Table summarizes 49 studies from 56 articles; the 6 utility weight studies based on models were not included in other analyses.

<sup>b</sup> Evaluated based on the Quality Index developed by the Mental Disorders and Illicit Drug Use Expert Group (20).
